# Supplementary material for: Scaffold-Free Retinal Pigment Epithelium Microtissues Exhibit Increased Release of PEDF
Source: MDPI journal article supplement (doi:10.3390/ijms222111317), 2021-10-20

## Supplementary Figure S1: Automated live-dead analysis of cell aggregates; code and example images.

Image j custom macro designed and written by Dr. Mark Ungrin

```
macro "Analyse clusters [f5]" {
    inputImage=getTitle();
    print("\\Clear");
    run("Clear Results");
    roiManager("Reset");
    print("Processing "+inputImage);

    mask_threshold=1200;
    data_slice_1=3;
    data_slice_2=2;
    mask_slice=1;
    min_size=1000;
    smoothing_iterations=20; // used during erode-dilate cycles to smooth outlines of masks, controls how
    finely the watershed algorithm divides up clusters
    test_mask=false;
    run_watershed=true;
    blur_size=10; // how much to blur the blue image before generating the mask - makes watershed less
    aggressive about splitting things up

    Dialog.create("Preferences");
    sliceCount = nSlices;
    sliceChoices=newArray(sliceCount);

    // Dialog.addNumber("Slice to use to identify objects:", mask_slice);
    for (i=0; i<sliceCount; i++) {
        Dialog.addString("Name for slice "+(i+1)+":", "Slice_"+(i+1));
        sliceChoices[i]=""+(i+1);
    }
    Dialog.addChoice("Slice to use to identify objects:", sliceChoices);
    //Dialog.addNumber("Slice to use to identify objects:", mask_slice);
    Dialog.addCheckbox("Only test object identification?", false);
    Dialog.addCheckbox("Run watershed segmentation to break apart objects in contact?", true);
    Dialog.addCheckbox("Automatically identify threshold value?", true);
    Dialog.addNumber("Manual threshold (used only if NOT selected automatically):", 1200);
    Dialog.addNumber("Smoothing iterations on mask:", smoothing_iterations);
    Dialog.addNumber("Blur levels on mask:", blur_size);
    Dialog.addNumber("Minimum object size to analyse:", min_size);
    Dialog.show();

    sliceNames=newArray(sliceCount);
    for (i=0; i<sliceCount; i++) {
        sliceNames[i]=Dialog.getString();
        print("Name for slice "+(i+1)+": "+sliceNames[i]);
    }
    mask_slice = Dialog.getChoice();
    print("mask_slice "+mask_slice);
    test_mask = Dialog.getCheckbox();
    print("test_mask "+test_mask);
    run_watershed = Dialog.getCheckbox();
```

```

print("run_watershed "+run_watershed);
auto_threshold = Dialog.getCheckbox();
print("auto_threshold "+auto_threshold);
mask_threshold = Dialog.getNumber();
print("mask_threshold "+mask_threshold);
smoothing_iterations = Dialog.getNumber();
print("smoothing_iterations "+smoothing_iterations);
blur_size = Dialog.getNumber();
print("blur_size "+blur_size);
min_size = Dialog.getNumber();
print("min_size "+min_size);

function check_saturation(name) {
    bit_depth=bitDepth();
    getRawStatistics(nPixels, meanVal, minVal, maxVal, stdVal, histogram);
    if (maxVal == (pow(2,bit_depth)-1)) {
        saturated_pixels = histogram[maxVal]/nPixels;
        getLut(reds, greens, blues);
        reds[255] = 255-reds[255];
        greens[255] = 255-greens[255];
        blues[255] = 255-blues[255];
        setLut(reds, greens, blues);
        showMessage("WARNING("+name+"): Intensity values for "+histogram[maxVal]+" pixels
out of "+nPixels+" are saturated (value="+maxVal+")\nIntegrated and mean intensity values calculated in this
channel will be artefactually low.\nConduct your analyses accordingly\nPlease try to capture images without
significant numbers of saturated pixels.");
    }
}

for (i=0; i<sliceCount; i++) {
    selectWindow(inputImage);
    setSlice(i+1);
    check_saturation(sliceNames[i]);
    run("Duplicate...", "title="+sliceNames[i]);
}
selectWindow(inputImage);
setSlice(mask_slice);
run("Duplicate...", "title=MASK_SLICE");

if (blur_size>0) run("Gaussian Blur...", "sigma="+blur_size+" scaled");

if (auto_threshold) {
    setAutoThreshold("Default dark");
} else {
    setThreshold(mask_threshold, 65535);
}

setOption("BlackBackground", false);
run("Convert to Mask");
run("Options...", "iterations="+smoothing_iterations+" count=5 pad do=Nothing");
run("Fill Holes");
setOption("BlackBackground", false);
run("Dilate");

```

```

run("Erode");
//run("Dilate");
if (run_watershed) run("Watershed");
//run("Set Measurements...", "area mean standard min centroid fit shape integrated display redirect=None
decimal=3");
run("Set Measurements...", "area mean standard min centroid shape integrated display redirect=None
decimal=3");
run("Input/Output...", "jpeg=85 gif=-1 file=.csv use use_file copy_column save_column");

run("Clear Results");
roiManager("Reset");

run("Analyze Particles...", "size="+min_size+"-Infinity show=Nothing display exclude add");
selectWindow("MASK_SLICE");
run("Close");
run("Clear Results");
if (!test_mask) {
    setBatchMode(true);
    roi_count=roiManager("Count");
    meanArray=newArray(sliceCount);
    print("sliceCount "+sliceCount+"", roi_count "+roi_count");
    for (i=0; i<roi_count; i++){
        roiManager("Select", i);
        roiManager("Rename", "Aggregate #"+(i+1)+"("+inputImage+)");
        for (j=0; j<sliceCount; j++){
            selectWindow(sliceNames[j]);
            print("ROI "+i+", slice "+sliceNames[j]+" of "+sliceCount);
            roiManager("Measure");
            meanArray[j]=getResult("Mean");
        }

        summaryRow = nResults();
        setResult("Label", summaryRow, "Aggregate #"+(i+1)+"("+inputImage+)");
        for (j=0; j<sliceCount; j++){
            setResult(sliceNames[j], summaryRow, meanArray[j]);
        }
        setResult("SUMMARY", summaryRow, "SUMMARY");
        updateResults();
    }
}

selectWindow(inputImage);
imgW = getWidth();
imgH = getHeight();

setBatchMode(false);

montageName = "Montage (" +inputImage+)";
newImage(montageName, "RGB black", imgW*sliceCount, imgH, 1);
setBatchMode(true);
fontSize = imgH / 10;
setFont("Sanserif", fontSize);
setColor(255, 255, 255);
for (j=0; j<sliceCount; j++){

```

```

        selectWindow(sliceNames[j]);
        run("Select All");
        run("Copy");
        selectWindow(montageName);
        makeRectangle(imgW*j, 0, imgW, imgH);
        run("Paste");
        drawString(sliceNames[j], imgW*j+fontSize*0.5, fontSize*1.5);
        selectWindow(sliceNames[j]);
        run("Close");
    }
    setBatchMode(false);

    selectWindow(inputImage);
    roiManager("Show All");

    selectWindow("Results");

    selectWindow(montageName);
    roiManager("Show All");
}

```

### **Example 1: R400 RPE- $\mu$ T control**

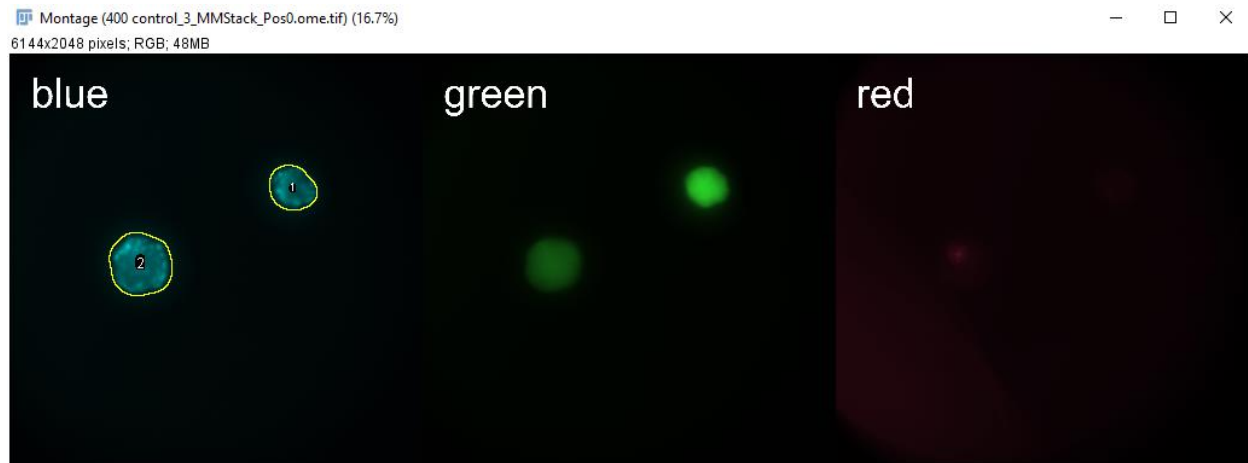

### **Example 2: R100 RPE- $\mu$ T injected:**

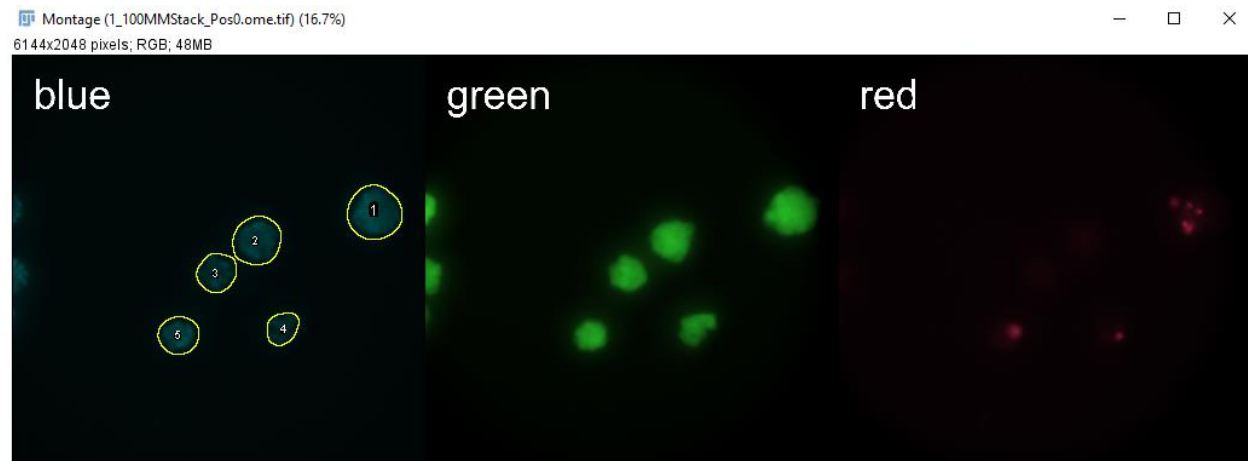

Supplement: s1 [file s1]
