# Supplementary material for: Scaffold-Free Retinal Pigment Epithelium Microtissues Exhibit Increased Release of PEDF
Source: MDPI journal article supplement (doi:10.3390/ijms222111317), 2021-10-20
Supplement: s1 [file s1]

**Table S2** RT-qPCR data comparing gene expression in ARPE-19 RPE- $\mu$ T to adherent culture.

| Gene    | Adherent culture mean $\Delta$ Ct $\pm$ SD | RPE- $\mu$ T mean $\Delta$ Ct $\pm$ SD | P-value |
|---------|--------------------------------------------|----------------------------------------|---------|
| FASL    | 7.01 $\pm$ 1.24                            | 6.26 $\pm$ 1.50                        | 0.0161  |
| TIMP3   | -3.23 $\pm$ 2.94                           | -2.93 $\pm$ 3.73                       | 0.569   |
| TGFB    | -2.86 $\pm$ 1.57                           | -0.806 $\pm$ 1.76                      | 0.0024  |
| VEGF-A  | -3.12 $\pm$ 1.67                           | 0.239 $\pm$ 1.61                       | 0.0049  |
| PDGF-AA | -0.476 $\pm$ 0.841                         | 0.392 $\pm$ 0.815                      | 0.0005  |
| IGF-1   | 5.04 $\pm$ 3.31                            | 3.25 $\pm$ 3.66                        | 0.0322  |
| BDNF    | -4.28 $\pm$ 1.18                           | -3.55 $\pm$ 1.589                      | 0.206   |
| GAS6    | -0.758 $\pm$ 0.849                         | 0.854 $\pm$ 0.530                      | 0.002   |
| FGF2    | -5.22 $\pm$ 1.02                           | -2.66 $\pm$ 2.49                       | 0.0002  |
| RPE65   | 1.54 $\pm$ 0.878                           | 0.749 $\pm$ 0.447                      | 0.109   |
| CFH     | -1.69 $\pm$ 0.804                          | -1.97 $\pm$ 1.55                       | 0.455   |
| TRMP1   | 1.01 $\pm$ 0.351                           | 0.659 $\pm$ 0.769                      | 0.193   |
| BEST1   | 0.367 $\pm$ 0.752                          | 0.190 $\pm$ 0.459                      | 0.519   |
| FGF2R   | 0.852 $\pm$ 0.308                          | 0.895 $\pm$ 0.244                      | 0.931   |
| MYRIP   | -0.397 $\pm$ 0.414                         | -0.071 $\pm$ 0.482                     | 0.151   |
| CCL2    | -5.46 $\pm$ 1.73                           | -4.01 $\pm$ 2.31                       | 0.008   |
| IL-8    | -4.91 $\pm$ 1.64                           | -1.83 $\pm$ 1.66                       | 0.0005  |
| LHX2    | 0.0847 $\pm$ 1.73                          | 3.77 $\pm$ 2.23                        | 0.0005  |
| LOXL    | -4.47 $\pm$ 0.856                          | -1.72 $\pm$ 1.26                       | 0.0002  |
| KDR     | 3.68 $\pm$ 2.52                            | 7.18 $\pm$ 2.30                        | 0.001   |

**Table S3** RT-qPCR data comparing gene expression in ES-RPE RPE- $\mu$ T to adherent culture.

| Gene    | Mean $\Delta$ Ct $\pm$ SD ES-RPE adherent culture | Mean $\Delta$ Ct $\pm$ SD ES-RPE $\mu$ T | P-value |
|---------|---------------------------------------------------|------------------------------------------|---------|
| FASL    | 7.31 $\pm$ 0.497                                  | 7.38 $\pm$ 0.638                         | 0.700   |
| TIMP3   | -5.50 $\pm$ 1.11                                  | -3.82 $\pm$ 3.91                         | 0.037   |
| TGFB    | -0.886 $\pm$ 1.04                                 | 0.473 $\pm$ 0.714                        | 0.001   |
| VEGF-A  | -2.87 $\pm$ 1.28                                  | 2.54 $\pm$ 3.02                          | 0.002   |
| PDGF-AA | 0.730 $\pm$ 0.476                                 | 0.560 $\pm$ 0.303                        | 0.232   |
| IGF-1   | 2.96 $\pm$ 1.08                                   | 4.91 $\pm$ 2.51                          | 0.0068  |
| BDNF    | 0.453 $\pm$ 4.06                                  | 2.01 $\pm$ 4.27                          | 0.0049  |
| GAS6    | -0.573 $\pm$ 0.476                                | 0.167 $\pm$ 0.488                        | 0.032   |
| FGF2    | -1.22 $\pm$ 1.22                                  | 0.877 $\pm$ 3.06                         | 0.0098  |
| RPE65   | 0.66 $\pm$ 0.646                                  | -0.152 $\pm$ 0.986                       | 0.024   |
| CFH     | -3.04 $\pm$ 1.314                                 | -0.599 $\pm$ 1.12                        | 0.001   |
| TRMP1   | -0.433 $\pm$ 2.57                                 | -0.439 $\pm$ 1.14                        | 0.638   |
| BEST1   | -0.157 $\pm$ 0.977                                | -0.229 $\pm$ 1.53                        | >0.99   |
| FGF2R   | -0.217 $\pm$ 0.270                                | -0.269 $\pm$ 0.359                       | 0.625   |
| MYRIP   | -1.14 $\pm$ 0.796                                 | -0.776 $\pm$ 0.830                       | 0.042   |
| CCL2    | -3.99 $\pm$ 3.50                                  | -0.25 $\pm$ 4.41                         | 0.240   |
| IL-8    | -1.59 $\pm$ 2.47                                  | 3.77 $\pm$ 3.58                          | 0.001   |
| LHX2    | -0.834 $\pm$ 1.79                                 | 6.18 $\pm$ 2.36                          | 0.001   |
| LOXL    | -3.67 $\pm$ 1.05                                  | -0.72 $\pm$ 0.590                        | 0.001   |
| KDR     | 0.461 $\pm$ 2.03                                  | 3.08 $\pm$ 2.41                          | 0.002   |
