# Supplementary material for: Scaffold-Free Retinal Pigment Epithelium Microtissues Exhibit Increased Release of PEDF
Source: MDPI journal article supplement (doi:10.3390/ijms222111317), 2021-10-20
Supplement: s1 [file s1]

**Table S1** A list of antibodies used in this project, the animals they were raised in, their optimized concentrations, and their specificity and function.

| <b>Antibody</b>    | <b>Animal</b> | <b>Manufacturer</b>                        | <b>Conc.</b> | <b>Specificity and function</b>                                                                                                               | <b>Reference</b> |
|--------------------|---------------|--------------------------------------------|--------------|-----------------------------------------------------------------------------------------------------------------------------------------------|------------------|
| <b>CRALBP</b>      | Mouse         | Abcam<br>cat # ab15051                     | 1/500        | An essential protein for the visual recycling function of RPE                                                                                 | [49, 50]         |
| <b>melanopsin</b>  | Rabbit        | Advanced Targeting Systems<br>cat # Ab-n38 | 1/500        | Allows RPE to absorb light to protect the retina against photo-oxidation                                                                      | [11]             |
| <b>RPE65</b>       | Mouse         | Abcam<br>cat # ab13826                     | 1/500        | An essential isomerohydrolase enzyme in the retinoid visual cycle                                                                             | [102]            |
| <b>Sox9</b>        | Rabbit        | Millipore<br>cat # ab5535                  | 1/500        | Transcription factor that regulates the expression of important genes in RPE like BEST1 and RPE65                                             | [103, 104]       |
| <b>ZO-1</b>        | Mouse         | Invitrogen<br>cat # 339100                 | 1/50         | Tight junction marker is reported to regulate RPE homeostasis                                                                                 | [105]            |
| <b>LRAT</b>        | Rabbit        | Abcam<br>cat # ab137304                    | 1/500        | An essential protein for the retinol uptake by RPE and 11-cis retinal recycling                                                               | [51, 102]        |
| <b>β-catenin</b>   | Rabbit        | Cell Signalling<br>cat # 8814              | 1/500        | Signalling molecule that is linked to inducing the expression of Mitf and OTX2 in development                                                 | [106]            |
| <b>Best1</b>       | Mouse         | Abcam<br>cat # ab2182                      | 1/500        | Found in the basolateral side of the RPE and preserves calcium ion regulation                                                                 | [52, 53]         |
| <b>MITF</b>        | Rabbit        | Abcam<br>cat # ab20663                     | 1/500        | RPE specific transcription factor that is crucial for RPE differentiation and function                                                        | [55]             |
| <b>Laminin</b>     | Rabbit        | Abcam<br>cat # ab11575                     | 1/200        | Extracellular matrix secreted by RPE apically and basally contribute to the structure of the basement membrane and interphotoreceptor matrix. | [56, 57]         |
| <b>Fibronectin</b> | Rabbit        | Abcam<br>cat # ab23750                     | 1/200        | As per laminin                                                                                                                                |                  |

|                    |        |                       |       |                |  |
|--------------------|--------|-----------------------|-------|----------------|--|
| <b>Collagen IV</b> | Rabbit | Abcam<br>cat # ab6586 | 1/200 | As per laminin |  |
|--------------------|--------|-----------------------|-------|----------------|--|

**Additional supplemental references related to Table S1.**

102. Moiseyev, G.; Chen, Y.; Takahashi, Y.; Wu, B.X.; Ma, J.; Nathans, J. RPE65 visual is the cycle in the isomerohydrolase retinoid. *Proc. Natl. Acad. Sci. U. S. A.* **2005**, *102*, 12413–12418, doi:10.1073/pnas.0503460102.
103. Masuda, T.; Esumi, N. SOX9, through Interaction with Microphthalmia-associated Transcription Factor (MITF) and OTX2, Regulates BEST1 Expression in the Retinal Pigment Epithelium. *J. Biol. Chem.* **2010**, *285*, 26933–26944, doi:10.1074/jbc.M110.130294.
104. Masuda, T.; Wahlin, K.; Wan, J.; Hu, J.; Maruotti, J.; Yang, X.; Iacovelli, J.; Wolkow, N.; Kist, R.; Dunaief, J.L.; et al. Transcription Factor SOX9 Plays a Key Role in the Regulation of Visual Cycle Gene Expression in the Retinal Pigment Epithelium. *J. Biol. Chem.* **2014**, *289*, 12908–12921, doi:10.1074/jbc.M114.556738.
105. Georgiadis, A.; Tschernutter, M.; Bainbridge, J.W.B.; Balaggan, K.S.; Mowat, F.; West, E.L.; Munro, P.M.G.; Thrasher, A.J.; Matter, K.; Balda, M.S.; et al. The tight junction associated signalling proteins ZO-1 and ZONAB regulate retinal pigment epithelium homeostasis in mice. *PLoS One* **2010**, *5*, 1–10, doi:10.1371/journal.pone.0015730.
106. Fujimura, N.; Taketo, M.M.; Mori, M.; Korinek, V.; Kozmik, Z. Spatial and temporal regulation of Wnt/ $\beta$ -catenin signaling is essential for development of the retinal pigment epithelium. *Dev. Biol.* **2009**, *334*, 31–45, doi:10.1016/j.ydbio.2009.07.002.
